# Supplementary material for: Shipborne measurements of ClNO 2 in the Mediterranean Sea and around the Arabian Peninsula during summer
Source: Copernicus journal article supplement (doi:10.5194/acp-2019-531), 2019-06-12
Supplement: Supplementary file [file acp-2019-531-AC1-supplement.pdf]

## Reply to RC1

5 *In the following, the referee's comments are reproduced (black) along with our replies (blue) and changes made to the text (red) in the revised manuscript.*

### General statement:

10 Eger et al. present measurements of ClNO<sub>2</sub>, HCl, SO<sub>2</sub>, O<sub>3</sub>, and NO<sub>2</sub> mixing ratios in the Eastern Mediterranean Sea around the Arabian Peninsula during summer 2017. The data inform about the conversion of N<sub>2</sub>O<sub>5</sub> to ClNO<sub>2</sub> in this environment and are a welcome addition to the literature as there are few such measurements outside North America, China and Europe. The analysis is thorough and shows that the ClNO<sub>2</sub> production from NO<sub>3</sub> (epsilon) is small, which is not surprising considering the warm temperatures that shift the  
15 equilibrium away from N<sub>2</sub>O<sub>5</sub> chemistry.

*We thank the referee for the positive evaluation of our manuscript and the useful comments and suggestions. We modified the manuscript according to the comments listed below.*

### General comments:

20 The data set is broken up into sections by region (Gulf of Oman, Gulf of Aden, Red Sea, etc.) and presented as (nocturnal) averages, median, and maxima (Table 1 + Figure 2). I felt that this wasn't the most accessible way to present the data and added confusion. Examples are the averaged nocturnal locations shown in Figs 2 and 5. It would have been more transparent  
25 to present a continuous trace of ship locations color-coded by ClNO<sub>2</sub> mixing ratios (and split the figure up into part a = leg 1 and part b = leg 2).

*In line with these suggestions we have redrawn Fig. 2 which now shows a continuous trace of nocturnal data points colour-coded by ClNO<sub>2</sub> mixing ratios and split up into first and second leg. To avoid excessive overlap of data points we use 1-hour averages instead of the original  
30 5 min data. The former Fig. 2 was shifted to the supplement (now Fig. S6) and the manuscript text has been modified:*

*“Maximum ClNO<sub>2</sub> mixing ratios observed during each night ranged from the limit of detection to 586 pptv (see Fig. S6 for details). Figure 2 shows 1-hour averaged ClNO<sub>2</sub> mixing ratios along the ship track during (a) first and (b) second leg. Text boxes indicate the median night-time mixing ratios of O<sub>3</sub>, HCl, NO<sub>2</sub> and SO<sub>2</sub> for the different regions where data from the first  
35 and second leg datasets have been combined.”*

*We also added a similar plot color-coded by  $\epsilon$  (complemental to Fig. 5) to the supplement to provide additional information. A reference was added to the text.*

*“[...] (for a more detailed plot with 1-hour averaged data points see Fig. S13).”*

After all, averages can be skewed by plumes.

The nocturnal averages of  $\epsilon$  in Fig. 5 are median values and thus less influenced by single plumes than mean values would be.

5

I also felt that the data were over-interpreted since changes are interpreted as regional differences rather than temporal ones. Imo, it would have perhaps been more informative to stay put in one or two places for some time for that reason, but that was perhaps outside the control of authors.

10 The aim of the AQABA campaign was to achieve a large spatial coverage around the Arabian Peninsula (within a reasonable time period of 2 months) as the whole region is severely understudied. It was thus not intended and out of the control of the authors to stay longer in some area to increase statistics. Despite high temporal variability in observed CINO<sub>2</sub> mixing ratios within one region, we still think that the separation into different regions is a useful way to present the large amount of data and is not unjustified with respect to the different air mass characteristics (e.g. NO<sub>x</sub> levels).

15

Overall, the manuscript is suitable for ACP. However, the manuscript is on the long side and could (and perhaps should) be condensed.

20 The analysis of this large dataset covering a two-month campaign is quite complex and the paper is necessarily a bit on the long side. To keep it as short as possible we already had moved information (e.g. details of the calculation of  $\epsilon$  and corrections to the aerosol particle surface area concentration) to the supplement and felt we had the right balance of information in the main manuscript and the supporting information. We have not been able to identify further text sections we could easily move to the supplement without perturbing the basic structure of the manuscript. However, we shifted Fig. 7 (calculation of  $f$  via first method, now Fig. S14) to reduce the amount of figures.

25

Some figures are missing axis labels (Latitude, longitude, day, month, etc.).

30 We added labels to the figures where they were missing, see specific comments below.

There are also few typos in equations that need to be corrected.

Typos in equations have been corrected, see specific comments below.

35 The date formatting does not adhere to ACP standards, e.g., 25 July 2007 (dd month yyyy), not 25.7.

We changed the date formatting throughout the manuscript, see specific comments below.

## Specific comments:

Page 2, reaction (6). There is also a minor channel producing NO<sub>2</sub>.

- 5 We added the reaction for the minor production channel and changed the labelling of the two linked reactions. We now write:

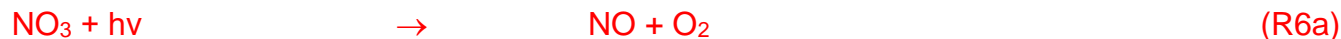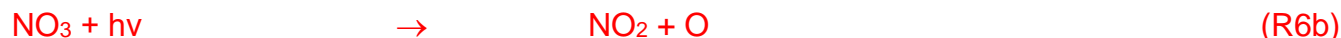

- 10 Page 4 line 29. You would get two time series, one for *m/z* 208 and another for *m/z* 210. Please specify how you used two masses (added them, or averaged them) or did you chose one over the other?

We chose *m/z* 208 for its higher S/N-ratio to calculate the ClNO<sub>2</sub> mixing ratios. The mean ratio of *m/z* 208 to *m/z* 210 for the whole campaign was 3.08 (which is very close to the theoretical value of 3.13) with a correlation coefficient of  $R^2 = 0.96$ . We added the corresponding plot to the supplement and modified the text with the following:

15 “We chose the signal at *m/z* 208 for its higher signal-to-noise (S/N) ratio to calculate the ClNO<sub>2</sub> mixing ratios reported. For the whole campaign dataset, the ratio between *m/z* 208 and *m/z* 210 was 3.08 ( $R^2 = 0.96$ , see Fig. S1) which is very close to the expected value of 3.13 derived from the natural abundance of the <sup>35</sup>Cl and <sup>37</sup>Cl isotopes, indicating no significant interferences at either of the two *m/z*.”

Note that you can get a IBr<sup>-</sup> at 208.

25 According to Liao et al. (2011), HO<sup>81</sup>Br can also be detected as I<sup>81</sup>Br<sup>-</sup>, possibly interfering with ICINO<sub>2</sub><sup>-</sup> at *m/z* 208. However, this is a minor channel compared with the formation of IHO<sup>81</sup>Br<sup>-</sup> (*m/z* 223) and, as stated above, the correlation between *m/z* 208 and *m/z* 210 was very good, indicating that we did not detect any significant interference.

30 Liao, J., et al. "A comparison of Arctic BrO measurements by chemical ionization mass spectrometry and long path-differential optical absorption spectroscopy." *Journal of Geophysical Research: Atmospheres* 116.D14 (2011).

Line 31 – here, you give one sensitivity. Shouldn't the sensitivity at *m/z* 210 be ~1/3 that of *m/z* 208?

35 Yes, that is true. We added the sensitivity for *m/z* 210 to the text, which is 0.20 Hz pptv<sup>-1</sup>.  
“I·ClNO<sub>2</sub><sup>-</sup> is more specific than ICl<sup>-</sup> (*m/z* 162 and 164) and has a lower background signal, providing a sensitivity of 0.61 Hz pptv<sup>-1</sup> per 10<sup>6</sup> Hz of I<sup>-</sup> at *m/z* 208 (and 0.20 Hz pptv<sup>-1</sup> at *m/z* 210), a limit of detection (LOD) (2σ, 5 min) of 12 pptv and a total measurement uncertainty of 30 % ± 6 pptv.”

40

Page 5- line 2. Again, how did you use two  $m/z$  values to get one mixing ratio?

We only used  $m/z$  188 to calculate the HCl mixing ratio, as  $m/z$  190 suffers from a high background signal and an interference from  $I\cdot HNO_3^-$ . We added the sensitivity for  $m/z$  190 to the text, which is  $0.05 \text{ Hz pptv}^{-1}$ .

“HCl was observed as  $I(CN)Cl^-$  ( $m/z$  188 and 190) (Eger et al., 2019) with a sensitivity of  $0.17 \text{ Hz pptv}^{-1}$  per  $10^6 \text{ Hz}$  of  $I^-$  at  $m/z$  188 (and  $0.05 \text{ Hz pptv}^{-1}$  at  $m/z$  190), a detection limit of 98 pptv and a total measurement uncertainty of  $20 \% \pm 72 \text{ pptv}$ . As  $m/z$  190 suffers from known interferences (e.g.  $I\cdot HNO_3^-$ ) and has a lower S/N ratio, we used  $m/z$  188 to calculate the HCl mixing ratios reported.”

Page 5. Please comment if the stack emissions truly interfered with CINO2 measurement by CIMS, or if the data were filtered simply as a precaution.

The datasets of all instruments sampling from the common inlet were filtered for our own stack emissions as a precaution because these fresh emissions (containing large amounts of particles,  $NO_x$ , hydrocarbons, black carbon, soot etc.) superimpose with the measured air masses and can potentially bias the results. Data where NO is above background level (like in our own ship’s plume) is excluded from the calculation of  $\epsilon$ , anyway. We amended the text:

“All datasets were filtered prior to analysis for periods where the measurements were contaminated by stack emissions to avoid a potential bias in the results.”

Page 6 line 12 “modified” how? Was it equipped with a photolytic converter?

We agree that the word “modified” adds confusion, so we decided to remove it and to add a reference instead (Li et al., 2015), describing the instrument with its modifications.

“NO and  $NO_2$  were measured by a chemiluminescence detector (CLD 790 SR, ECO Physics, Duernten, Switzerland) (Fontijn et al., 1970; Li et al., 2015).”

Page 6 lines 18-19. Meusel et al. 2016 state that J values were not corrected for up-welling UV radiation. This should also be stated here since it biases the J values low.

That is right, the J-values were not corrected for upwelling UV radiation, which is included in the overall uncertainty. We added a note to the text:

“J-values were not corrected for upwelling UV radiation and are estimated to have an overall uncertainty of  $\approx 10 \%$ .”

Page 9 equation (2).  $[O_3]$  also changes over time.

In our simple calculation of  $\epsilon$  we assume that  $[O_3]$  does not change over time, as already mentioned in the text. The relative decrease in  $[O_3]$  over time is usually negligible ( $< 10 \%$ ), given the total uncertainty of the calculation, whereas the relative increase in  $[NO_2]$  from time  $t_0$  to  $t$  can be large and has to be accounted for. We added a line to emphasise this:

“In this calculation we assume that  $[NO_2]$  changes over time but  $[O_3]$  stays constant in good approximation.”

Page 10 “Boundary layer height of 1000 m”. That seems high for the marine boundary layer. Is there evidence to corroborate such a high mixing height?

5 We used an estimated boundary layer height only to give an example of potential rates of HNO<sub>3</sub> loss, which would impact on our calculation of the reaction time via equation (5). We also state that we relax the criterion for a match between calculated time and time elapsed since the beginning of the night as such effects, which depend i.a. on the boundary layer height and the HNO<sub>3</sub> to NO<sub>2</sub> ratio, are rather uncertain. We have deleted the reference to boundary layer height as it was NOT used in correction, and may have been misleading.

10 Page 11 equation (8). Please define Keq. Should it be capitalized?

Yes, *K<sub>eq</sub>* should be capitalized. We added a definition to the text.

15 “[...] where *A* is the particle surface area concentration,  $\bar{c}$  is the mean molecular velocity of N<sub>2</sub>O<sub>5</sub> ((24400 ± 160) cm s<sup>-1</sup> during AQABA) and  $K_{eq} = \frac{[N_2O_5]}{[NO_2][NO_3]} = 2.8 \times 10^{-27} (T/300)^{-0.6} \exp(11000/T) \text{ cm}^3 \text{ molecule}^{-1}$  (IUPAC, 2019) is the temperature-dependent equilibrium constant (Reactions R4 and R5).”

Page 13 Please check equation 11 – does not look right.

Line 2 – “k” does not appear in equation 11; perhaps it should say “B” rather than “Bk”?

20 The equation was corrected (brackets were placed the wrong way) and parameters were renamed for better readability.

$$\gamma = B \times k \times \left( 1 - \left( \left( a \times \frac{[H_2O(l)]}{[NO_3^-]} \right) + 1 + \left( b \times \frac{[Cl^-]}{[NO_3^-]} \right) \right)^{-1} \right) \quad (11)$$

25 where  $B = 3.2 \times 10^{-8} \text{ s}$ ,  $k = 1.15 \times 10^6 - 1.15 \times 10^6 \exp(-0.13 [H_2O(l)]) \text{ s}^{-1}$  is the rate constant for the reaction N<sub>2</sub>O<sub>5</sub>(aq) + H<sub>2</sub>O(l),  $a = 0.06$  denotes the ratio of rate constants for reactions H<sub>2</sub>NO<sub>3</sub><sup>+</sup>(aq) + H<sub>2</sub>O(l) and H<sub>2</sub>NO<sub>3</sub><sup>+</sup>(aq) + NO<sub>3</sub><sup>-</sup>(aq) and  $b = 29$  denotes the ratio of rate constants for reactions H<sub>2</sub>NO<sub>3</sub><sup>+</sup>(aq) + Cl<sup>-</sup> and H<sub>2</sub>NO<sub>3</sub><sup>+</sup>(aq) + NO<sub>3</sub><sup>-</sup>(aq).

30 Line 10. 14+/-14% and throughout the paper. Since the % operator applies to both 14 and 14, please add brackets (14+/14)%. Otherwise, it reads as a percent error, i.e., is interpreted as 14+/-2. This is repeated throughout the paper (e.g., line 21, 13+/10% could be 13+/-1.3). Same goes for units when uncertainties are given (e.g., line 31, 25-35 °C)

This was corrected throughout the manuscript.

Page 15 line 15 – punctuation error. Note that there are others like this throughout the paper.

35 Punctuation errors were corrected throughout the manuscript.

Equation 15 is incorrect.

We corrected the typo in the equation:

$$5 \quad p\text{OH}_{03} = \frac{2 J_{\text{O1D}} [\text{O}_3] \times k_{\text{H}_2\text{O}} [\text{H}_2\text{O}]}{k_{\text{H}_2\text{O}} [\text{H}_2\text{O}] + k_{\text{N}_2} [\text{N}_2] + k_{\text{O}_2} [\text{O}_2]}$$

Page 19. Many references are missing doi's.

DOIs have been added.

10 Figure 2 and Figure 3. Please label all axes for clarity.

Missing labels have been added to the figures. Dates have been modified (e.g. "Day in July").

Figure 4 A lot of the variability may be due to not having enough data. Consider longer averages (1 hr, 90 min, or 2 hr) for the ClNO<sub>2</sub> data.

15 The variability is mainly due to a mixture of high atmospheric variability and a limited number of days we spent in one region. Changing the averaging interval to e.g. 1 hour did not significantly change the shape of the curves.

20 Figure 7. Are you sure if this analysis is valid? It is possible that changes in NO<sub>z</sub> and ClNO<sub>2</sub> are due to shifting air mass.

(Note: The former Fig. 7 was shifted to the supplement and is now Fig. S14, see above.)

25 For this analysis we assume (as stated in the text) that we sample a homogeneous air mass (indicated by wind direction, T, RH etc.), i.e. changes in NO<sub>z</sub> and ClNO<sub>2</sub> are not caused by a change of the air mass within the period of observation. As this requirement was rarely fulfilled, we could only analyse the four different episodes mentioned in the text.

Figure 8. Are these total chloride and total sodium concentrations, or from certain size fractions only? (state in caption)

(Note: The former Fig. 8 is now Fig. 7.)

30 These are PM<sub>1</sub> data only (AMS measurements, see Sect. 2.5). We added the information to the caption:

"Co-variance between mixing ratios of SO<sub>2</sub>, NO<sub>2</sub> and HCl and particulate chloride depletion (calculated from Eq. 12) illustrated by the difference in Cl<sup>-</sup> and Na<sup>+</sup> (PM<sub>1</sub>) measured."

35 Figures 9 and 10. I think it's important to point out here that the authors only consider selected sources of radicals (ClNO<sub>2</sub> photolysis and O<sub>1</sub>D+H<sub>2</sub>O). Some important ones are omitted (such as Cl<sub>2</sub> and HONO photolysis and HO<sub>2</sub>+NO).

We added text to the beginning of section 3.6:

40 "Other potential Cl sources (e.g. Cl<sub>2</sub> photolysis) are not considered here as we do not have experimental data to quantify their impact."

We also added a sentence to the paragraph where we describe the calculation of  $P_{OH}(O_3)$ :

“As we do not consider other OH production channels (e.g. photolysis of HONO or  $HO_2 + NO$ ), which can be of importance under more polluted conditions,  $pOH_{O_3}$  represents a lower limit of  $pOH$ .”

5

The labelling and caption of the former Fig. 9 (now Fig. 8) has been modified to emphasise that only exclusive channels were considered:

“Time series of  $ClNO_2$  mixing ratios,  $J_{ClNO_2}$  photolysis rates and production of Cl-radicals from  $ClNO_2$  photolysis ( $pCl_{ClNO_2}$ ) and OH-radicals from  $O_3$  photolysis in the presence of  $H_2O$  ( $pOH_{O_3}$ ) for two consecutive nights in the Gulf of Oman.”

10

Figure 10 I wouldn't lump  $HCl + OH \rightarrow H_2O + Cl$  (a conversion of one radical to another) in with OH and Cl production from  $O_3$  and  $ClNO_2$  photolysis (which generate radicals from stable molecules).

15

In former Fig. 10 (now Fig. 9) we only compare the relative contribution of  $HCl + OH$  and  $ClNO_2 + hv$  to Cl radical formation. Although transformation of OH into Cl does not change the overall radical budget nor the  $RO_2$  budget, the relative oxidation rates of several VOCs will be modified as Cl reacts much faster with some of them than OH does.
